# Supplementary material for: Dietary Fiber Intake and Risk of Pancreatic Cancer: Systematic Review and Meta-Analysis of Observational Studies
Source: MDPI journal article supplement (doi:10.3390/ijerph182111556), 2021-11-03
Supplement: s1 [file s1]

**Table S1:** Full search strategy

| Set | Database (PubMed/Medline)                                                                                                                                                                                                                                                                                                                                                                                                                                                                                                                                                                                                                                                                                                                             |
|-----|-------------------------------------------------------------------------------------------------------------------------------------------------------------------------------------------------------------------------------------------------------------------------------------------------------------------------------------------------------------------------------------------------------------------------------------------------------------------------------------------------------------------------------------------------------------------------------------------------------------------------------------------------------------------------------------------------------------------------------------------------------|
|     | ("Dietary Fibers"[All Fields] OR "Fibers"[Title] OR "Fiber"[Title] OR "fibre"[Title] OR "fibres"[Title] OR "Wheat Bran"[Title/Abstract] OR "Wheat Brans"[Title/Abstract] OR "Roughage"[Title/Abstract] OR "Roughages"[Title/Abstract] OR "grain"[Title/Abstract] OR "grains"[All Fields] OR "Bread"[MeSH Terms] OR "Edible Grain"[MeSH Terms] OR "Fruit"[MeSH Terms] OR "Vegetables"[MeSH Terms] OR "cereal"[Title/Abstract] OR "cereals"[Title/Abstract]) AND ("Pancreatic Neoplasms"[MeSH Terms] OR ("Pancreas"[Title/Abstract] OR "pancreatic"[Title/Abstract]) AND ("Cancer"[Title/Abstract] OR "tumor"[Title/Abstract] OR "neoplasm"[Title/Abstract] OR "cancers"[Title/Abstract] OR "tumors"[Title/Abstract] OR "neoplasms"[Title/Abstract])))) |
| Set | Database (SCOPUS)                                                                                                                                                                                                                                                                                                                                                                                                                                                                                                                                                                                                                                                                                                                                     |
|     | (( TITLE-ABS-KEY ( dietary ) ) AND ( fiber OR fibre OR fibers OR fibres OR "Wheat Bran" OR "Wheat Brans" OR grain OR grains OR cereal OR cereals ) ) AND ( ( TITLE-ABS-KEY ( pancreas OR pancreatic ) ) AND ( TITLE-ABS-KEY ( cancer OR neoplasm ) ) )                                                                                                                                                                                                                                                                                                                                                                                                                                                                                                |
|     |                                                                                                                                                                                                                                                                                                                                                                                                                                                                                                                                                                                                                                                                                                                                                       |

**Table S2.** Detailed description of inclusion/exclusion criteria, based on PECOS (Population, Exposure, Comparison, Outcomes and Study design)

| <b>Search strategy</b>    | <b>Details</b>                                                                                                                                                                                                                                                                          |
|---------------------------|-----------------------------------------------------------------------------------------------------------------------------------------------------------------------------------------------------------------------------------------------------------------------------------------|
| <i>Inclusion criteria</i> | <p>P: adult population (female and male)</p> <p>I: questionnaire/interview measuring dietary fibre intake</p> <p>C: the highest vs the lowest intake</p> <p>O: risk of pancreatic cancer (if any)</p> <p>S: primary observational studies (cohort, case-control, cross-sectional)</p>   |
| <i>Exclusion criteria</i> | <p>P: infants, children and adolescents</p> <p>I: no assessment of dietary intake</p> <p>O: other outcomes not related to pancreatic cancer risk</p> <p>S: not original papers (opinion paper, review article, commentary, letter, article without quantitative data, book chapter)</p> |
| <i>Language filter</i>    | English                                                                                                                                                                                                                                                                                 |
| <i>Time filter</i>        | No filter (from inception)                                                                                                                                                                                                                                                              |
| <i>Database</i>           | PubMed/Medline; Scopus                                                                                                                                                                                                                                                                  |

**Table S3.** Reasons for exclusion after full-text assessment.

| Author year [Ref]                                               | Number of studies | Reasons for exclusion                                                |
|-----------------------------------------------------------------|-------------------|----------------------------------------------------------------------|
| Silverman, 1998 [27]; Jarosz, 2012 [28]                         | 2                 | Data not extractable                                                 |
| Chatenoud, 1998 [29]; La Vecchia, 2003 [30]; Schacht, 2021 [31] | 3                 | Whole grain without specifying dietary fiber                         |
| Zheng, 1993 [32]                                                | 1                 | Fruits and vegetables without specifying dietary fiber               |
| Fraser, 1999 [33]; Ghorbani, 2015 [34]                          | 2                 | Dietary patterns or cooking methods without specifying dietary fiber |

**Table S4.** Quality assessment of the included studies, using the Newcastle-Ottawa Scale (NOS).

| Author, year [Ref]             | Selection |        |        |        | Comparability |         | Outcome/Exposure <sup>^</sup> |        |        | Total score |
|--------------------------------|-----------|--------|--------|--------|---------------|---------|-------------------------------|--------|--------|-------------|
|                                | Item 1    | Item 2 | Item 3 | Item 4 | Item 5a       | Item 5b | Item 6                        | Item 7 | Item 8 |             |
| Baghurst, 1991 [35]            | *         | *      | *      | *      | -             | *       | -                             | *      | -      | 6           |
| Bidoli, 2012 [36]              | *         | -      | -      | *      | *             | *       | -                             | *      | *      | 6           |
| Bueno de Mesquita, 1991 [37]   | -         | *      | *      | *      | *             | *       | -                             | *      | -      | 6           |
| Chan, 2007 [38]                | *         | *      | *      | *      | *             | *       | *                             | *      | *      | 9           |
| Ghadirian, 1991 [39]           | *         | -      | *      | *      | *             | *       | -                             | *      | -      | 6           |
| Gordon-Dseagu, 2017 [40]       | *         | *      | *      | *      | -             | *       | *                             | *      | *      | 8           |
| Howe, 1990 [42]                | *         | *      | *      | *      | -             | *       | -                             | *      | -      | 6           |
| Howe, 1992 [41]                | -         | -      | *      | *      | -             | *       | -                             | *      | -      | 4           |
| Jansen, 2011 [43]              | *         | *      | -      | *      | *             | *       | *                             | *      | -      | 7           |
| Ji, 1995 [44]                  | *         | *      | *      | *      | *             | *       | -                             | *      | -      | 7           |
| Kalapothaki, 1993 [45]         | *         | *      | -      | *      | *             | *       | -                             | *      | -      | 6           |
| Koulouris, 2019 [46]           | *         | *      | *      | *      | *             | *       | *                             | *      | *      | 9           |
| Lin, 2005 [47]                 | *         | *      | *      | *      | *             | *       | -                             | *      | *      | 8           |
| Lyon, 1993 [48]                | *         | *      | *      | *      | *             | *       | -                             | *      | -      | 7           |
| Stolzenberg-Solomon, 2002 [50] | *         | *      | *      | *      | *             | *       | *                             | *      | *      | 9           |
| Stolzenberg-Solomon, 2005 [49] | *         | *      | *      | *      | -             | -       | *                             | *      | *      | 7           |
| Zatonski, 1991 [51]            | *         | *      | *      | *      | -             | *       | *                             | *      | -      | 7           |
| Zhang, 2009 [52]               | *         | *      | *      | *      | -             | *       | -                             | *      | *      | 7           |

<sup>^</sup> Based on study design: for case-control the NOS assesses the exposure, for cross-sectional and cohort studies the outcome.  
 \* Each star represents a high-quality criterion accomplished by the study.
